# Supplementary material for: A rapid and efficient in vitro regeneration system for lettuce (Lactuca sativa L.)
Source: Plant Methods. 2017 Jul 21;13:58. doi: 10.1186/s13007-017-0208-0 (PMC5520378; doi:10.1186/s13007-017-0208-0)
Supplement: Supplementary file 1 — Additional file 1. A spreadsheet containing all raw data generated and analyzed during this study. The first sheet contains the data for cultivar ‘RSL NFR’ and the second sheet contains the data for cultivar ‘Winter Density’. [file 13007_2017_208_MOESM1_ESM.xlsx]

## Sheet: Cultivar RSL NFR
Medium	Plate number	Explants per plate	Explants with shoots	%	Average	SD	N
M1	1	15	0	0	8.88889	10.1835	45		Data for cultivar 'RSL NFR' at week 8 since explant excision
	2	15	3	20					Number of shoots developed per single explant not quantified
	3	15	1	6.66667					Data does not reflect size, growth speed or overall quality of shoots
M2	1	15	1	6.66667	1.33333	2.98142	75
	2	15	0	0
	3	15	0	0
	4	15	0	0
	5	15	0	0
M3	1	15	6	40	60	21.4994	90
	2	15	11	73.3333
	3	15	11	73.3333
	4	15	4	26.6667
	5	15	12	80
	6	15	10	66.6667
M4	1	15	5	33.3333	26.6667	6.66667	45
	2	15	3	20
	3	15	4	26.6667
M5	1	15	5	33.3333	31.1111	30.0617	45
	2	15	9	60
	3	15	0	0
M6	1	15	12	80	82.2222	3.849	45
	2	15	13	86.6667
	3	15	12	80
M7	1	15	4	26.6667	40	11.547	45
	2	15	7	46.6667
	3	15	7	46.6667
M8	1	15	1	6.66667	13.3333	17.6383	45
	2	15	5	33.3333
	3	15	0	0
M9	1	15	1	6.66667	4.44444	3.849	45
	2	15	1	6.66667
	3	15	0	0
M10	1	15	1	6.66667	4.44444	3.849	45
	2	15	1	6.66667
	3	15	0	0
M11	1	15	2	13.3333	6.66667	6.66667	45
	2	15	1	6.66667
	3	15	0	0
M12	1	15	1	6.66667	4.44444	3.849	45
	2	15	1	6.66667
	3	15	0	0
M13	1	15	0	0	2.22222	3.849	45
	2	15	1	6.66667
	3	15	0	0
M14	1	15	1	6.66667	15.5556	10.1835	45
	2	15	2	13.3333
	3	15	4	26.6667
M15	1	15	6	40	42.2222	28.1793	90
	2	15	13	86.6667
	3	15	0	0
	4	15	5	33.3333
	5	15	6	40
	6	15	8	53.3333
M16	1	15	0	0	22.2222	17.2133	90
	2	15	5	33.3333
	3	15	7	46.6667
	4	15	1	6.66667
	5	15	4	26.6667
	6	15	3	20
M17	1	15	6	40	32.2222	14.9972	180
	2	15	3	20
	3	15	4	26.6667
	4	15	9	60
	5	15	5	33.3333
	6	15	5	33.3333
	7	15	3	20
	8	15	2	13.3333
	9	15	3	20
	10	15	8	53.3333
	11	15	7	46.6667
	12	15	3	20
M18	1	15	5	33.3333	59.2593	28.1749	135
	2	15	3	20
	3	15	10	66.6667
	4	15	15	100
	5	15	15	100
	6	15	9	60
	7	15	5	33.3333
	8	15	8	53.3333
	9	15	10	66.6667
M19	1	15	11	73.3333	90.8333	7.91823	120
	2	15	13	86.6667
	3	15	14	93.3333
	4	15	14	93.3333
	1	15	14	93.3333
	2	15	15	100
	3	15	14	93.3333
	4	15	14	93.3333
M20	1	15	0	0	0	0	45
	2	15	0	0
	3	15	0	0
M21	1	15	0	0	0	0	45
	2	15	0	0
	3	15	0	0
Control	1	15	1	6.66667	9.01961	12.0049	255
	2	15	0	0
	3	15	0	0
	4	15	0	0
	5	15	0	0
	6	15	0	0
	7	15	0	0
	8	15	5	33.3333
	9	15	2	13.3333
	10	15	3	20
	11	15	4	26.6667
	12	15	1	6.66667
	13	15	1	6.66667
	14	15	0	0
	15	15	5	33.3333
	16	15	1	6.66667
	17	15	0	0

## Sheet: Cultivar Winter Density
Medium	Plate number	Explants per plate	Explants with shoots	%	Average	SD	N
M1	1	15	0	0	4.44444	7.698	45		Data for cultivar 'Winter Density' at week 8 since explant excision
	2	15	2	13.3333					Number of shoots developed per single explant not quantified
	3	15	0	0					Data does not reflect size, growth speed or overall quality of shoots
M2	1	15	0	0	0	0	60
	2	15	0	0
	3	15	0	0
	4	15	0	0
M3	1	15	7	46.6667	44.4444	6.8853	90
	2	15	5	33.3333
	3	15	8	53.3333
	4	15	6	40
	5	15	7	46.6667
	6	15	7	46.6667
M4	1	15	0	0	2.22222	3.849	45
	2	15	0	0
	3	15	1	6.66667
M5	1	15	1	6.66667	8.88889	10.1835	45
	2	15	0	0
	3	15	3	20
M6	1	15	8	53.3333	33.3333	17.6383	45
	2	15	3	20
	3	15	4	26.6667
M7	1	15	2	13.3333	6.66667	6.66667	45
	2	15	1	6.66667
	3	15	0	0
M8	1	15	0	0	0	0	45
	2	15	0	0
	3	15	0	0
M9	1	15	1	6.66667	2.22222	3.849	45
	2	15	0	0
	3	15	0	0
M10	1	15	0	0	0	0	45
	2	15	0	0
	3	15	0	0
M11	1	15	0	0	4.44444	3.849	45
	2	15	1	6.66667
	3	15	1	6.66667
M12	1	15	1	6.66667	4.44444	3.849	45
	2	15	1	6.66667
	3	15	0	0
M13	1	15	1	6.66667	4.44444	3.849	45
	2	15	0	0
	3	15	1	6.66667
M14	1	15	1	6.66667	2.22222	3.849	45
	2	15	0	0
	3	15	0	0
M15	1	15	0	0	8.33333	10	60
	2	15	3	20
	3	15	2	13.3333
	4	15	0	0
M16	1	15	4	26.6667	14.6667	10.9545	75
	2	15	3	20
	3	15	1	6.66667
	4	15	3	20
	5	15	0	0
M18	1	15	0	0	10	12.7657	60
	2	15	0	0
	3	15	2	13.3333
	4	15	4	26.6667
M19	1	15	2	13.3333	15.5556	3.849	45
	2	15	2	13.3333
	3	15	3	20
M20	1	15	0	0	0	0	45
	2	15	0	0
	3	15	0	0
M21	1	15	0	0	0	0	45
	2	15	0	0
	3	15	0	0
Control	1	15	0	0	4.16667	6.38285	240
	2	15	0	0
	3	15	0	0
	4	15	0	0
	5	15	0	0
	6	15	0	0
	7	15	1	6.66667
	8	15	3	20
	9	15	1	6.66667
	10	15	0	0
	11	15	0	0
	12	15	0	0
	13	15	1	6.66667
	14	15	2	13.3333
	15	15	2	13.3333
	16	15	0	0
